# Supplementary material for: Activity-dependent switch of GABAergic inhibition into glutamatergic excitation in astrocyte-neuron networks
Source: eLife journal article supplement (doi:10.7554/elife.20362), 2016-12-24
Supplement: supp [file elife-20362-supp-v1.zip]

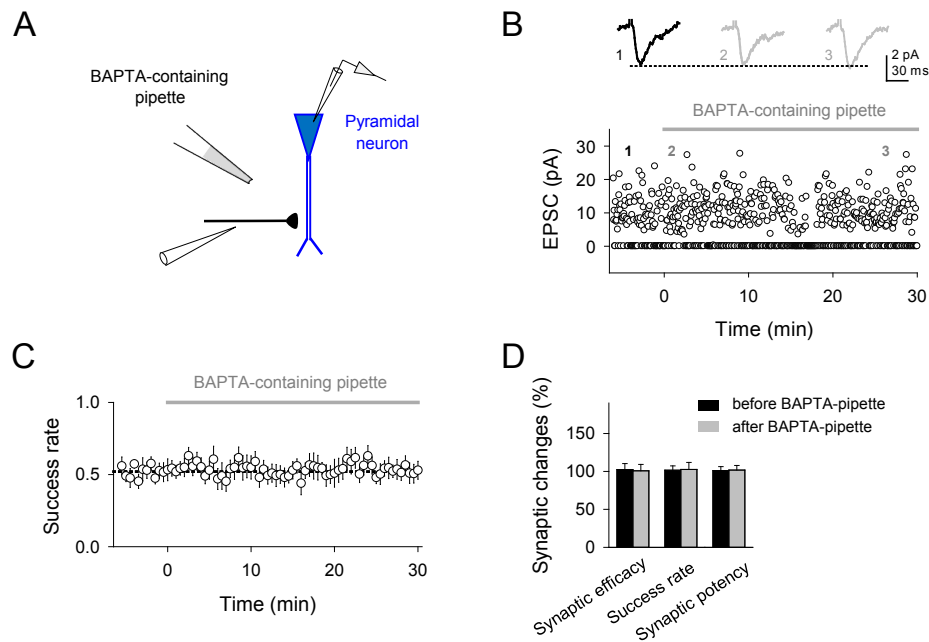

**Figure 3-figure supplement 1. BAPTA-containing pipette in the extracellular space does not affect synaptic responses.** (A) Schematic experimental design showing the single synapse stimulation, neuronal recording and BAPTA-containing pipette location. (B) Representative EPSCs before and after different time points placing the BAPTA-containing pipette at the slice (*top*; gray bar) and temporal course of single synapse activity in presence of BAPTA-containing pipette (*bottom*). (C) Average success rate values from different experiments ( $n = 10$  synapses). (D) Relative changes of synaptic parameters relative to basal before (black) and after placing BAPTA-containing pipette (gray bars;  $n = 10$ ). Note that absence of synaptic effects after buffering  $\text{Ca}^{2+}$  into astrocytes were not caused by the leakage of BAPTA in extracellular space and buffering  $\text{Ca}^{2+}$ , thus reducing transmitter release, because the presence of the BAPTA-containing patch pipette for 30 min in slices did not affect synaptic parameters (Synaptic efficacy,  $P = 0.887$ ; Success rate,  $P = 0.938$ ; Synaptic potency,  $P = 0.923$ ). Error bars indicate SEM.
