# Supplementary material for: Activity-dependent switch of GABAergic inhibition into glutamatergic excitation in astrocyte-neuron networks
Source: eLife journal article supplement (doi:10.7554/elife.20362), 2016-12-24
Supplement: supp [file elife-20362-supp-v1.zip]

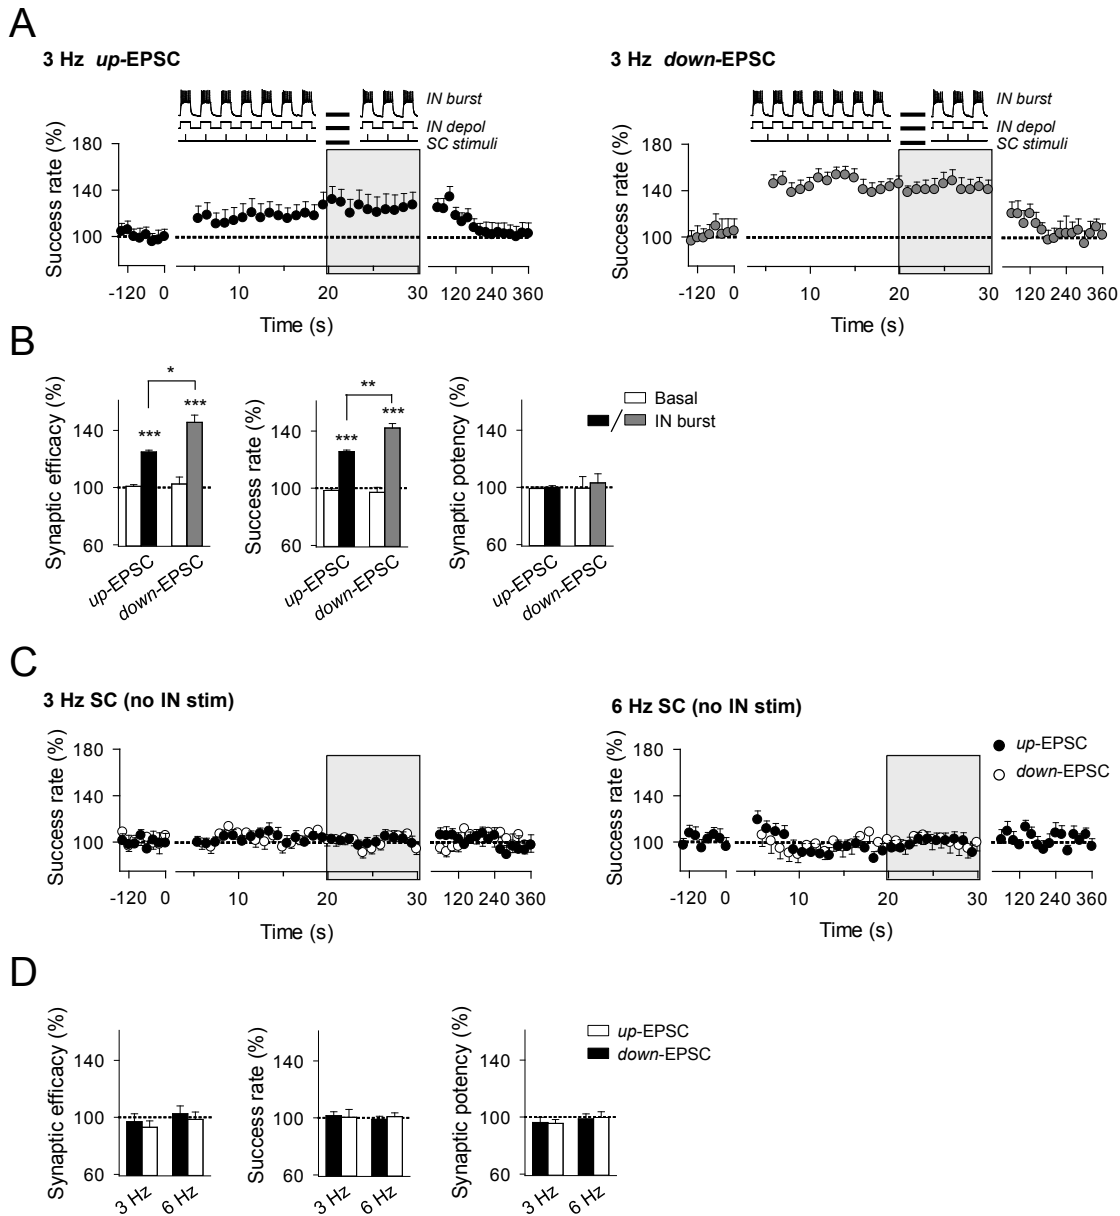

**Figure 5-figure supplement 2. Effects of phase-locked activity between interneuron and excitatory synaptic activity.** (A) Averaged relative changes of the success rate over time during SC stimuli at 3 Hz and bursts of interneuron APs (top panel schemes, and described in **Figure 5**), when SC stimuli coincided with the interneuron up-state, i.e., during the interneuron bursts of APs ( $n = 6$ , *left*), or down-state, i.e., during the resting state between two consecutive interneuron bursts of APs ( $n = 5$ ; *right*). (B) Relative changes of synaptic parameters for conditions shown in A. Synaptic efficacy *up*:  $P < 0.001$ ; paired  $t$  test. Synaptic efficacy *down*:  $P < 0.001$ ; paired  $t$  test. Synaptic efficacy *up* vs *down*:  $P = 0.016$ ; unpaired  $t$  test. (C) Relative changes of the success rate over time for up-EPSCs and down-EPSCs, without interneuron stimulation, evoked by SC stimulation at 3 Hz ( $n = 8$ ) and 6 Hz ( $n = 11$ ). (D) Relative values of synaptic parameters in absence of interneuron stimulation. SC stimulation 3 Hz ( $n = 8$ ;  $P > 0.05$ ; paired  $t$  test) and 6 Hz ( $n = 11$ ;  $P > 0.05$ ; paired  $t$  test). \* $P < 0.05$ , \*\* $P < 0.01$ , \*\*\* $P < 0.001$ . Error bars indicate SEM.
