# Supplementary material for: Activity-dependent switch of GABAergic inhibition into glutamatergic excitation in astrocyte-neuron networks
Source: eLife journal article supplement (doi:10.7554/elife.20362), 2016-12-24
Supplement: supp [file elife-20362-supp-v1.zip]

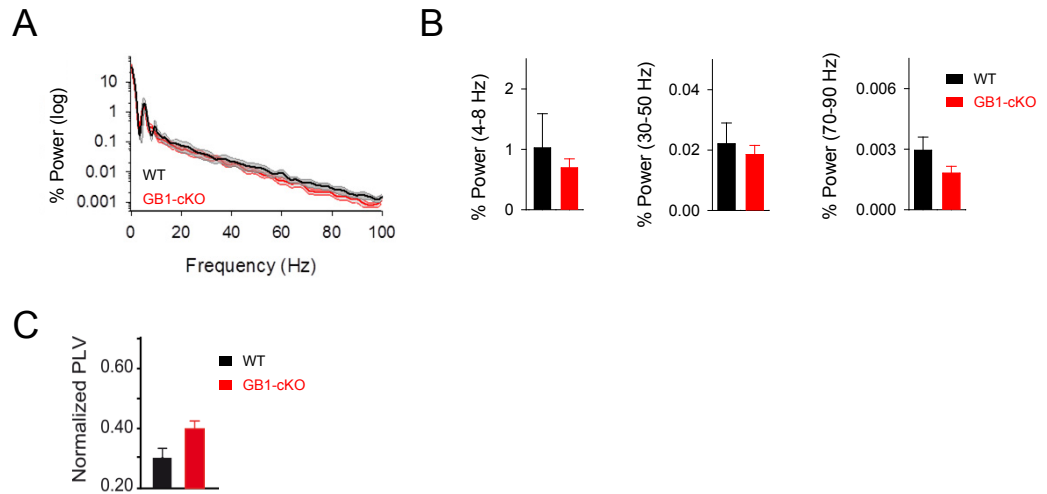

**Figure 7-figure supplement 1. Resting activity in GB1-cKO and control littermate mice.** (A) Normalized power spectrum analysis of the LFP recordings in hippocampal CA1 region in GB1-cKO (red,  $n = 6$ ) and control littermate mice (black,  $n = 6$ ) in unstimulated conditions. (B) Relative changes of normalized power at different oscillation frequencies for GB1-cKO and control littermate mice. No significant differences in network activity were observed in resting conditions between those mice. Theta band,  $P = 0.485$ ; unpaired  $t$ -test. Low gamma  $P = 0.937$ ; Wilcoxon rank-sum test. High gamma oscillations,  $P = 0.158$ ; Wilcoxon rank-sum test. (C) PVL index in resting conditions for GB1-cKO and control littermate mice did not show significant changes (PVL=  $0.30 \pm 0.03$  and  $0.39 \pm 0.03$  for control and GB1-cKO;  $n = 24$  and  $36$  epochs, respectively;  $P = 0.06$ ; unpaired  $t$  test). Error bars indicate SEM.
