# Supplementary material for: Activity-dependent switch of GABAergic inhibition into glutamatergic excitation in astrocyte-neuron networks
Source: eLife journal article supplement (doi:10.7554/elife.20362), 2016-12-24
Supplement: supp [file elife-20362-supp-v1.zip]

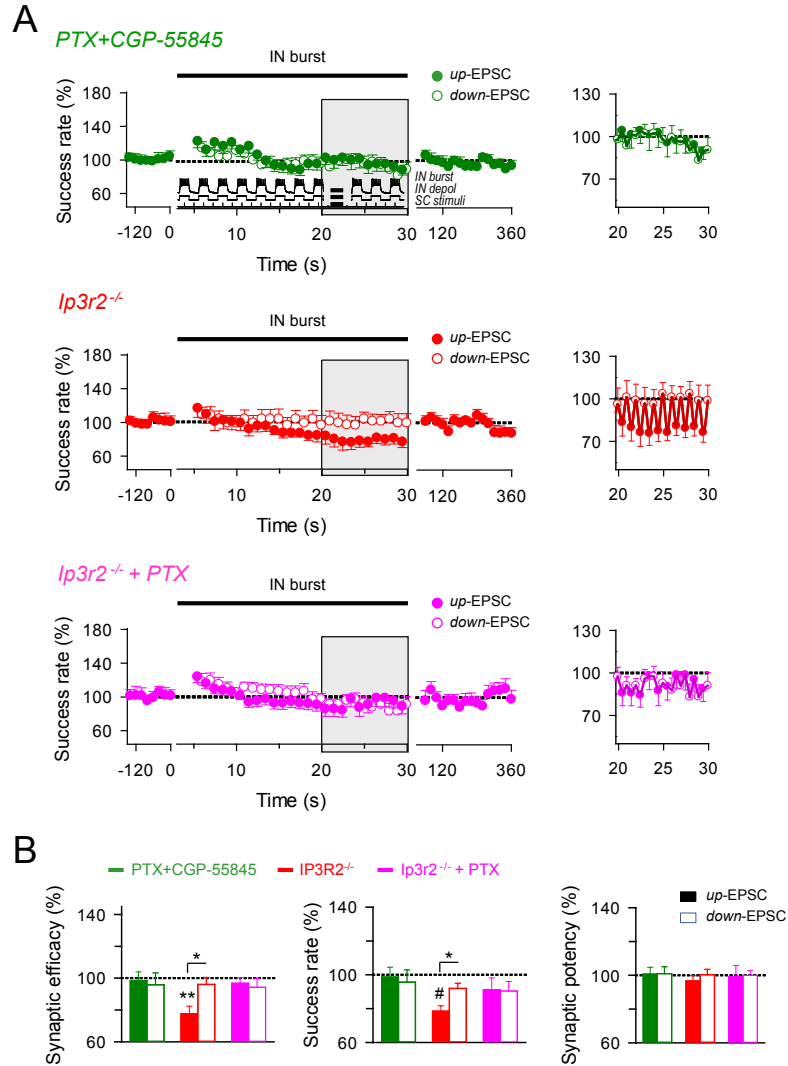

**Figure 5-figure supplement 1. GABA<sub>A</sub> and GABA<sub>B</sub> interplay in the astrocyte-interneuron modulation of the excitatory synaptic transmission. (A) Left, averaged relative success rate of up-EPSCs (closed circles) and down-EPSCs (open circles) evoked by the stimulation protocol described in **Figure 5** (inset) over time in wild-type mice in the presence of picrotoxin plus CGP55845 (PTX+CGP; green), and in *Ip3r2*<sup>-/-</sup> mice in control (red) and in the presence of picrotoxin (PTX; pink). Each point represents the simple moving average of 15 consecutive EPSCs. Horizontal bars indicate the time of pairing. Right, expanded view of gray-shaded areas. (B) Relative changes of synaptic parameters for up-EPSCs (filled bars) and down-EPSCs (open bars) in wild-type mice in the presence of picrotoxin plus CGP55845 (PTX+CGP; green;  $n = 9$ ;  $P = 0.81$  (synaptic efficacy up);  $P = 0.61$  (synaptic efficacy down); paired  $t$  test), and in *Ip3r2*<sup>-/-</sup> mice in control (red;  $n = 7$ ;  $P = 0.004$  (synaptic efficacy up);  $P = 0.37$  (synaptic efficacy down); paired  $t$  test) and in the presence of picrotoxin (pink;  $n = 10$ ;  $P = 0.46$  (synaptic efficacy up);  $P = 0.35$  (synaptic efficacy down); paired  $t$  test). \* $P < 0.05$ , \*\* $P < 0.01$ , # $P < 0.001$ . Error bars indicate SEM.**
